# Supplementary material for: Synthesis of Poly(Trimethylene Carbonate) from Amine Group Initiation: Role of Urethane Bonds in the Crystallinity
Source: MDPI journal article supplement (doi:10.3390/polym13020280), 2021-01-16
Supplement: s1 [file s1]

## Supporting Materials

### Typical procedure for polymerization of TMC initiated by ROP-amine with MSA in one step.

Propylamine (1 eq.) and MSA (0.2 eq.) were added into a solution of TMC (100 eq.) in CH<sub>2</sub>Cl<sub>2</sub> (1.0 mol.l<sup>-1</sup>). Then the mixture was stirred at room temperature until the complete consumption of the amine. After 24 hours then reaction was uncompleted (conv. 50%), the crude solution was precipitated in methanol.

<sup>1</sup>H NMR (δ in ppm, CDCl<sub>3</sub>, 400 MHz): 4.4 (t, CH<sub>2</sub> TMC), 4.2 (t, CH<sub>2</sub>), 4.0 (m, CH<sub>2</sub>), 3.8 (m, CH<sub>2</sub>), 3.0 (MSA), 2.2 (q, CH<sub>2</sub> TMC), 2.0 (q, CH<sub>2</sub>), 1.8 (m, CH<sub>2</sub>), 1.0 (t, CH<sub>3</sub>).

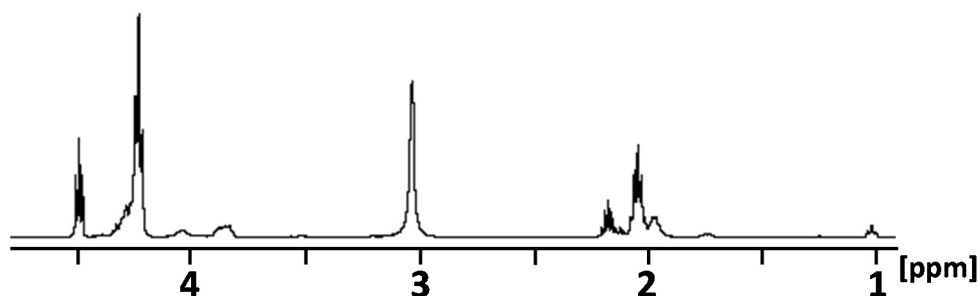

Figure S1. <sup>1</sup>H NMR at 24 hours in one step of PTMC with MSA (CDCl<sub>3</sub>).

### Typical procedure for polymerization of TMC initiated by ROP-amine with TBD in one step

1,6-Hexanediamine (1 eq.) and TBD (0.2 eq.) were added into a solution of TMC (100 eq.) in CH<sub>2</sub>Cl<sub>2</sub> (1.0 mol.l<sup>-1</sup>). Then the mixture was stirred at room temperature until the complete consumption of the amine monitoring by <sup>1</sup>H NMR. After complete conversion, TBD was quenched with benzoic acid. The crude solution was precipitated in methanol.

<sup>1</sup>H NMR (δ in ppm, CDCl<sub>3</sub>, 400 MHz): 4.2 (t, CH<sub>2</sub>), 3.7 (m, CH<sub>2</sub>), 2.0 (q, CH<sub>2</sub>).

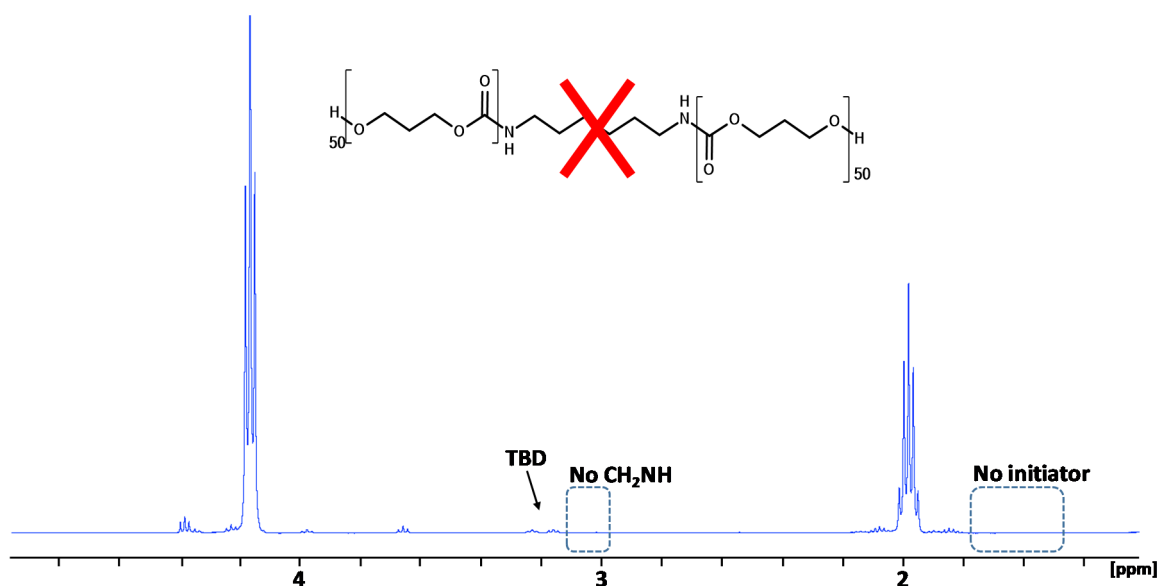

Figure S2. <sup>1</sup>H NMR in one step of PTMC initiated by 1,6-hexanediamine with TBD (CDCl<sub>3</sub>).

### Typical procedure for polymerization of TMC initiated by ROP-amine with TBD in one pot two step

Propylamine (1 eq.) was added into a solution of TMC (100 eq.) in  $\text{CH}_2\text{Cl}_2$  ( $1.0 \text{ mol.L}^{-1}$ ). The mixture was stirred at  $30^\circ\text{C}$  until the complete consumption of the amine. Then a solution of TBD (0.2 eq.) in  $\text{CH}_2\text{Cl}_2$  was added to the reaction mixture. After complete reaction, TBD was quenched with benzoic acid. The crude solution was precipitated in methanol.

$^1\text{H NMR}$  ( $\delta$  in ppm,  $\text{CDCl}_3$ , 400 MHz): 4.7 (m, 1 H, NH), 4.2 (t, 40 or 400 H,  $\text{CH}_2$ ), 3.8 (m, 2 H,  $\text{CH}_2$ ), 3.4 (TBD), 3.2 (m, 2 H,  $\text{CH}_2$ ), 2.0 (q, 20 or 200 H,  $\text{CH}_2$ ), 1.5 (m, 2 H,  $\text{CH}_2$ ), 0.9 (t, 3 H,  $\text{CH}_3$ ).

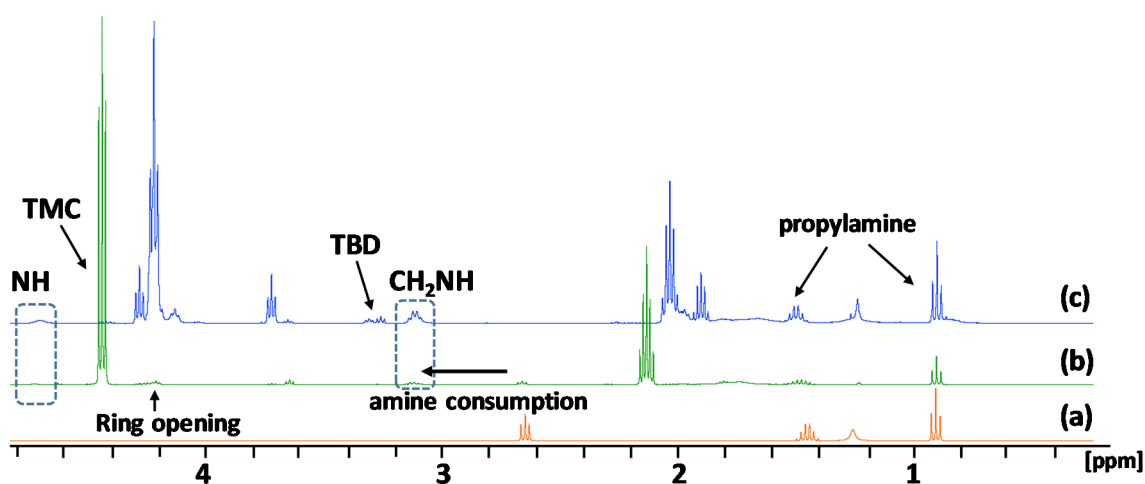

**Figure S3.**  $^1\text{H NMR}$  in one pot two steps of (a) propylamine, (b) crude after 6 hours at  $30^\circ\text{C}$  and (c) PTMC after addition of TBD ( $\text{CDCl}_3$ )

### Typical procedure for functionalization of PTMC end chain by urethane

The urethanisation of the PTMC terminal groups achieved with propyl isocyanate (Sigma-Aldrich, France). PTMC (1 eq.) was dissolved in  $\text{CH}_2\text{Cl}_2$  ( $1.0 \text{ mol.L}^{-1}$ ) before adding propyl isocyanate (3 eq.). The reaction was catalyzed with 0.8 wt.% of dibutyltin dilaurate (DBTDL) from Sigma-Aldrich (Saint-Quentin-Fallavier, France). The solution was carried out at  $60^\circ\text{C}$  under magnetic stirring for 2 hours. The polymer was recovered by precipitation in methanol.

$^1\text{H NMR}$  ( $\delta$  in ppm,  $\text{CDCl}_3$ , 400 MHz): 4.7 (m, 1 H, NH), 4.2 (t, 40 or 400 H,  $\text{CH}_2$ ), 3.2 (m, 4 H,  $\text{CH}_2$ ), 2.0 (q, 20 or 200 H,  $\text{CH}_2$ ), 1.5 (m, 4 H,  $\text{CH}_2$ ), 0.9 (t, 6 H,  $\text{CH}_3$ ).

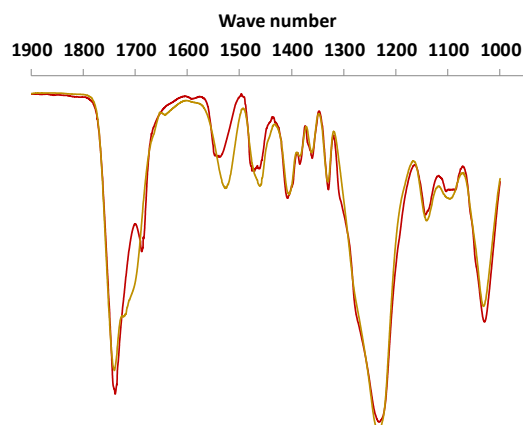

**Figure S4.** FT-IR spectra in  $\text{cm}^{-1}$  of  $\text{PTMCD-NH}$  (red) and  $\text{PTMCF-NH}$  (yellow)

**Table S1.** Thermal properties of  $\text{PTMCD-NH}$  ( $\text{DP}_n=100$ ) after 24 hours, 2 weeks, 4 weeks and 16 weeks.

| Time     | $T_g$ ( $^{\circ}\text{C}$ ) | $T_m$ ( $^{\circ}\text{C}$ ) | $\Delta H_m$ ( $\text{J}\cdot\text{g}^{-1}$ ) |
|----------|------------------------------|------------------------------|-----------------------------------------------|
| 24 hours | -31.3                        | -                            | -                                             |
| 2 weeks  | -30.6                        | 37.0                         | 25.6                                          |
| 4 weeks  | -25.0                        | 40.8                         | 52.5                                          |
| 16 weeks | -27.0                        | 38.3                         | 50.6                                          |

**Table S2.** Thermal properties of  $\text{PTMCF-NH}$  ( $\text{DP}_n=100$ ) after 2 weeks.

| PTMC              | $T_g$ ( $^{\circ}\text{C}$ ) | $T_m$ ( $^{\circ}\text{C}$ ) | $\Delta H_m$ ( $\text{J}\cdot\text{g}^{-1}$ ) |
|-------------------|------------------------------|------------------------------|-----------------------------------------------|
| $\text{PTMCD-NH}$ | -30.6                        | 37                           | 25.6                                          |
| $\text{PTMCF-NH}$ | -31.1                        | 39                           | 46.3                                          |

The addition of urethane function by end chain modification with isocyanate increases the number of urethane groups. This leads in IR by a band even more intense at  $1523\text{ cm}^{-1}$  and in DSC by an improvement of the crystallization (Figure S4 and Table S2).
